# Supplementary material
Source: PubMed Central journal article supplement (PMC2922535)
Supplement: 1005299107_pnas.201005299SI.pdf [file 1005299107_pnas.201005299SI.pdf]

# Supporting Information

Husain et al. 10.1073/pnas.1005299107

## SI Materials and Methods

**Bacterial Strains.** *Salmonella enterica* serovar Typhimurium strain ATCC 14028s was used as wild type and as a background for the construction of *ssrB* mutations and *lacZY*-transcriptional fusions (Table S1). The chromosomal *ssrB*::3xFlag fusion and its C203S substitution variant were prepared using the  $\lambda$  Red method as described (1). Primers (Table S2) encoding 60 nucleotides homologous to a target gene followed by 20 nucleotides homologous to the pSUB11 template plasmid were used for the PCR amplification of the Flp recombinant target (FRT)-flanked kanamycin resistance cassette with 3xFlag. The amplicons were DpnI digested and electroporated into *S. Typhimurium* strain TT22236 carrying the pTP2223 plasmid that expresses the  $\lambda$  Red recombinase under Ptac control. Mutations were moved into *S. Typhimurium* strain 14028s by P22-mediated transduction, and pseudodysogens were eliminated by streaking on Evans blue uranine agar plates. In-frame deletions were generated by recombining the two FRT sites flanking the kanamycin resistance cassette with the Flp recombinase encoded in the pCP20 plasmid (2). The *ssrB*::3xFlag or *ssrB* C203S::3xFlag was verified by sequencing analysis of a PCR fragment generated from genomic DNA. The *sppH2*::, *srfH*::, and *sifA*::*lacZY* transcriptional fusions were transduced from strains AV0208, AV0209, and AV0210 (3) into strains AV07104 and AV08171 expressing the *ssrB*::3xFLAG and *ssrB* C203S::3xFLAG alleles, respectively.

**Biotin Switch Assay.** Free thiols were blocked with four volumes of 250 mM Hepes, 1 mM EDTA, 0.1 mM neocuproine (HEN) buffer containing 20 mM methyl methanethiosulfonate and 2.5% (wt/vol) SDS at 50 °C with frequent vortexing. After 20 min, the cytoplasmic proteins were precipitated and washed with ice-cold acetone. The proteins were solubilized in 1% (wt/vol) SDS HEN buffer, and the nitrosothiols present in the specimens were reduced with 1 mM ascorbate. The exposed thiol groups were derivatized with 16.66 mM biotin {N-[6-(Biotinamido)hexyl]-3'-(2'-pyridyl)dithio)-propionamide} (Thermo Scientific) for 1 h at room temperature. After biotinylation of the S-nitrosothiols, the proteins were precipitated and washed with ice-cold acetone. The protein pellets were solubilized in 1% (wt/vol) SDS HEN buffer and mixed with two volumes of low-salt neutralization buffer (1 mM EDTA, 0.1 mM neocuproine, 100 mM NaCl, 0.5% (vol/vol) Triton X-100, 250 mM Hepes-NaOH, pH 7.7). A NeutrAvidin-agarose resin (Thermo Scientific) was added, and the mixture was incubated at 4 °C overnight. The resin was washed with high-salt neutralization buffer (1 mM EDTA, 0.1 mM neocuproine, 600 mM NaCl, 0.5% (vol/vol) Triton X-100, 250 mM Hepes-NaOH, pH 7.7), and the proteins were eluted after boiling the resin in 2x SDS sample buffer containing  $\beta$ -mercaptoethanol. The proteins were resolved on 12% (vol/vol) SDS/PAGE and electroblotted onto a nitrocellulose membrane. The blots were probed for the SsrB::3xFLAG protein with the M2 monoclonal antibody (Sigma-Aldrich).

**Expression and Purification of the SsrB Carboxyl-Terminal Domain Protein.** A 5' fragment of *ssrB* encoding residues 137–212 (SsrBc) was cloned in pET14b and expressed in *Escherichia coli* strain BL21(DE3), yielding *E. coli* strain AV0505. Expression of SsrBc was induced for 5 h by adding 1 mM isopropyl- $\beta$ -D-thiogalactopyranoside to cultures of AV0505 grown in LB medium to an OD<sub>600</sub> of 0.5. The cells were harvested by centrifugation, freeze/thawed at –80 °C, and incubated on ice for 20 min in 50 mM NaH<sub>2</sub>PO<sub>4</sub>, 300 mM NaCl, 10 mM imidazole lysis buffer, pH 8.0, containing 1 mg/mL chicken white lysozyme. The cells were lysed

by sonication. The cleared lysate was mixed with a Ni<sup>++</sup>-nitrilotriacetic acid resin (Qiagen) for 1 h at 4 °C. The resin was washed with 50 mM NaH<sub>2</sub>PO<sub>4</sub>, 300 mM NaCl, 20 mM imidazole buffer, pH 8.0, and the His-tagged SsrBc protein was eluted with 50 mM NaH<sub>2</sub>PO<sub>4</sub>, 300 mM NaCl, 300 mM imidazole buffer, pH 8.0. The protein was stored at –80 °C after glycerol was added to a final concentration of 5%.

**EMSA.** EMSAs were performed using the LightShift Chemiluminescent EMSA Kit (Thermo Scientific). Briefly, the SsrBc protein was affinity purified as described above. SsrBc was incubated at room temperature in 10 mM Tris-HCl, 50 mM KCl, 2.5% (vol/vol) glycerol, 5 mM MgCl<sub>2</sub>, 50 ng/ $\mu$ L poly(dI-dC), and 0.05% (vol/vol) Nonidet P-40 binding buffer, pH 7.5. After 10 min, 20 fmol of a biotin-labeled *ssrA* DNA fragment containing SsrB binding sites was added to the equilibrated SsrBc protein. After 20 min incubation at room temperature, the samples were resolved on a 5% nondenaturing polyacrylamide gel prepared in 45 mM Tris-borate and 1 mM EDTA (TBE) buffer. The specimens were electrotransferred onto a 0.45- $\mu$ m Biodyne B nylon membrane (Pall Corporation) at 380 mA for 30 min at 4 °C, and crosslinked to the membrane using a TL-2000 UV Translinker (Ultra-Violet Products). The blots were developed using Chemiluminescent Nucleic Acid Detection Module Kit (Thermo Scientific).

**Circular Dichroism Spectroscopy.** The His6-SsrB protein obtained by Ni<sup>++</sup>-nitrilotriacetic acid affinity chromatography was purified further at 4 °C on a Superdex-75 size-exclusion FPLC column equilibrated with 200 mM NaCl, 10% (vol/vol) glycerol, 50 mM NaH<sub>2</sub>PO<sub>4</sub> buffer, pH 8.0. Positive fractions were pooled and concentrated to 10 mg/mL using Centricon filter devices. Circular dichroism spectroscopy was performed on a Jasco-810 spectrometer with constant nitrogen flushing (Jasco). Circular optical cells with a path length of 0.05 cm were used to determine the spectra of proteins in PBS (100 mM NaCl, 80 mM Na<sub>2</sub>HPO<sub>4</sub>, 20 mM NaH<sub>2</sub>PO<sub>4</sub>, pH 7.4) over a wavelength of 195–250 nm in 1-nm increments. Each spectrum is the average of six wavelength scans.

**Transcriptional Analysis.** Transcription of SPI2 genes was induced in vitro by culturing *Salmonella* in 8  $\mu$ M MgCl<sub>2</sub> N salts medium (4). Briefly, *Salmonella* strains harboring *lacZY* transcriptional fusions grown overnight in LB broth were subcultured in high Mg<sup>2+</sup> N salts medium [5 mM KCl, 7.5 mM (NH<sub>4</sub>)SO<sub>4</sub>, 0.5 mM K<sub>2</sub>SO<sub>4</sub>, 1 mM KH<sub>2</sub>PO<sub>4</sub>, 10 mM MgCl<sub>2</sub>, 38 mM glycerol, 0.1% (wt/vol) casamino acids, 100 mM Tris-HCl, pH 7.6]. The bacteria were grown in high Mg<sup>2+</sup> N salts medium at 37 °C in a shaker incubator until they reached an OD<sub>600</sub> of 0.5. SPI2 transcription was induced by switching the bacteria to 8  $\mu$ M MgCl<sub>2</sub> N salts medium, pH 6.9, for 3 h. The expression of the *lacZY* transcriptional fusions was quantified spectrophotometrically as  $\beta$ -galactosidase enzymatic activity using the substrate *o*-nitrophenyl- $\beta$ -D-galactopyranoside.  $\beta$ -galactosidase activity is expressed in Miller Units using the equation:  $1,000 \times [(OD_{420} - 1.75 \times OD_{550}) / (T_{(min)} \times V_{(mL)} \times OD_{600})]$ .

**Macrophages.** Peritoneal macrophages were harvested from B6.129S6-Cybb<sup>tm1din/J</sup> (gp91phox<sup>-/-</sup>) (5) or gp91phox<sup>-/-</sup> iNOS<sup>-/-</sup> (6, 7) mice 4 d after i.p. inoculation of 1 mg/mL sodium periodate (8). The peritoneal exudate cells were resuspended in RPMI 1640 cell culture medium (Mediatech) supplemented with 10% heat-inactivated FBS (BioWhittaker), 15 mM Hepes, 2 mM L-glutamine, 1 mM sodium pyruvate (Sigma-Aldrich) (RPMI<sup>+</sup> medium)

containing 100 U/mL penicillin and 100 mg/mL streptomycin (Mediatech). The peritoneal exudate cells were seeded at  $2 \times 10^5$  cells/mL in 96-well plates (BD Biosciences) for  $\beta$ -galactosidase activity assays. The macrophages were enriched by adherence after 48 h of culture at 37 °C in a 5% CO<sub>2</sub> incubator.

**Measurement of Intracellular Transcription of *sifA*.** The  $\beta$ -galactosidase activity of *S. Typhimurium* strains harboring a *sifA::lacZY* transcriptional fusion was studied in *gp91phox*<sup>-/-</sup> or *gp91phox*<sup>-/-</sup> *iNOS*<sup>-/-</sup> macrophages. Macrophages were challenged at a multiplicity of infection of 2 with *lacZY*-expressing *S. Typhimurium* strains opsonized with 10% normal mouse serum for 20 min as described (9). Extracellular bacteria were removed from the macrophage monolayers 25 min after challenge by washing with prewarmed RPMI<sup>+</sup> medium containing 12  $\mu$ g/mL gentamicin (Sigma-Aldrich). *S. Typhimurium*-infected macrophages were lysed with 0.25% (wt/vol) deoxycholate 8 h after challenge.  $\beta$ -galactosidase

activity was measured in an Lmax luminometer (Molecular Devices) with the Galacto-Light Plus chemiluminescent reporter gene assay system according to the manufacturer's instructions (Applied Biosystems). Intracellular  $\beta$ -galactosidase expression is represented as mean arbitrary units of light/10<sup>6</sup> bacteria (A.U.)  $\pm$  SEM.

**Virulence of *Salmonella* in Murine Models of Infection.** C3H/HeNcr1/Br mice (8–10 wk old) were purchased from Charles River Laboratories. NRAMP1<sup>R</sup> C3H/HeNcr1 mice were challenged *per os* with  $\sim 10^7$  cfu or i.p. with  $3 \times 10^3$  cfu/mouse of *ssrB* C203S::3xFLAG *S. Typhimurium* (strain AV08171) or its isogenic control *ssrB*::3xFLAG (strain AV07104). Survival of *Salmonella*-infected mice was scored over time. Some of the mice were killed 5 or 10 d after infection. The spleens, livers, and mesenteric lymph nodes were excised and macerated in sterile PBS for plating on LB agar plates.

- Uzzau S, Figueroa-Bossi N, Rubino S, Bossi L (2001) Epitope tagging of chromosomal genes in *Salmonella*. *Proc Natl Acad Sci USA* 98:15264–15269.
- Cherepanov PP, Wackernagel W (1995) Gene disruption in *Escherichia coli*: TcR and KmR cassettes with the option of Flp-catalyzed excision of the antibiotic-resistance determinant. *Gene* 158:9–14.
- McCullister BD, Bourret TJ, Gill R, Jones-Carson J, Vázquez-Torres A (2005) Repression of SPI2 transcription by nitric oxide-producing, IFN $\gamma$ -activated macrophages promotes maturation of *Salmonella* phagosomes. *J Exp Med* 202:625–635.
- Deiwick J, Nikolaus T, Erdogan S, Hensel M (1999) Environmental regulation of *Salmonella* pathogenicity island 2 gene expression. *Mol Microbiol* 31:1759–1773.
- Pollock JD, et al. (1995) Mouse model of X-linked chronic granulomatous disease, an inherited defect in phagocyte superoxide production. *Nat Genet* 9:202–209.
- MacMicking JD, et al. (1995) Altered responses to bacterial infection and endotoxic shock in mice lacking inducible nitric oxide synthase. *Cell* 81:641–650.
- Shiloh MU, et al. (1999) Phenotype of mice and macrophages deficient in both phagocyte oxidase and inducible nitric oxide synthase. *Immunity* 10:29–38.
- Ding AH, Nathan CF, Stuehr DJ (1988) Release of reactive nitrogen intermediates and reactive oxygen intermediates from mouse peritoneal macrophages. Comparison of activating cytokines and evidence for independent production. *J Immunol* 141:2407–2412.
- McCullister BD, et al. (2008) N<sub>2</sub>O<sub>3</sub> enhances the nitrosative potential of IFN $\gamma$ -primed macrophages in response to *Salmonella*. *Immunobiology* 212:759–769.

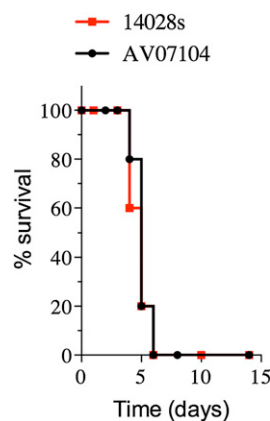

Fig. S1. Survival of C57BL/6 mice after i.p. inoculation of about 200 cfu of wild-type *Salmonella* strains ATCC 14028s or AV07104.

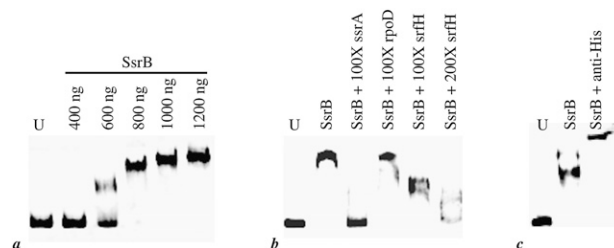

Fig. S2. (A) Gel shift of increasing concentrations of recombinant SsrBc and a biotinylated DNA fragment containing the *ssrA* promoter. U, unbound (control *ssrA* samples). (B) Binding of 300 ng SsrBc and 20 fmol biotinylated *ssrA* promoter in presence of 100- to 200-fold excess of unlabeled *ssrA*, *rpoD*, or *srfH* DNA. (C) Effect of 2  $\mu$ g anti-6 $\times$  His tag polyclonal antibody on the electrophoretic migration of His-tagged SsrBc and its cognate *ssrA* promoter.

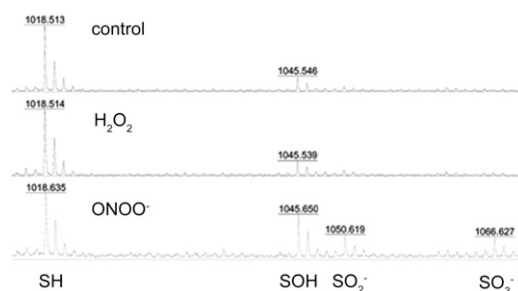

**Fig. S3.** Selective oxidation of the thiol group of SsrB C203 by  $\text{ONOO}^-$  but not  $\text{H}_2\text{O}_2$ . Oxidation of C203 on SsrB was analyzed by mass spectrometry after treatment of recombinant SsrB with 100  $\mu\text{M}$   $\text{ONOO}^-$  or 1 mM  $\text{H}_2\text{O}_2$ . Untreated SsrB was used as control.

**Table S1. Bacterial strains and plasmids**

| Strain                                      | Relevant characteristic                                        | Source        |
|---------------------------------------------|----------------------------------------------------------------|---------------|
| <i>E. coli</i> strain BL21(DE3)             | F-ompT hsdB (r-Bm-B) gal dcm(DE3) pLysS ( $\text{Cm}^R$ )      | Novagen       |
| <i>Salmonella</i> Typhimurium strain 14028s | Wild type                                                      | ATCC          |
| AV0208                                      | <i>sspH2::lacZY</i>                                            | (1)           |
| AV0209                                      | <i>srfH::lacZY</i>                                             | (1)           |
| AV0210                                      | <i>sifA::lacZY</i>                                             | (1)           |
| AV0321                                      | $\Delta$ <i>ssrB::FRT</i>                                      | This study    |
| AV0505                                      | pET14b:: <i>ssrB</i> (aa137-212)                               | This study    |
| AV0529                                      | pET14b:: <i>ssrB</i> (aa137-212) C203S                         | This study    |
| AV0628                                      | pET14b:: <i>ssrB</i> (aa137-212) C203E                         | This study    |
| AV07185                                     | pET14b:: <i>ssrB</i> (aa137-212) C203D                         | This study    |
| AV07260                                     | pGEX-6P-1:: <i>ssrB</i> (aa137-212)                            | This study    |
| AV0866                                      | pGEX-6P-1:: <i>ssrB</i> (aa137-212) C203D                      | This study    |
| AV07104                                     | <i>ssrB::3xFLAG</i>                                            | This study    |
| AV08171                                     | <i>ssrB</i> C203S:: <i>3xFLAG</i>                              | This study    |
| AV08267                                     | <i>ssrB::3xFLAG sifA::lacZY</i>                                | This study    |
| AV08268                                     | <i>ssrB::3xFLAG srfj::lacZY</i>                                | This study    |
| AV08269                                     | <i>ssrB::3xFLAG sspH2::lacZY</i>                               | This study    |
| AV08270                                     | <i>ssrB</i> C203S:: <i>3xFLAG sifA::lacZY</i>                  | This study    |
| AV08271                                     | <i>ssrB</i> C203S:: <i>3xFLAG srfj::lacZY</i>                  | This study    |
| AV08272                                     | <i>ssrB</i> C203S:: <i>3xFLAG sspH2::lacZY</i>                 | This study    |
| Plasmids                                    |                                                                |               |
| pCP20                                       | <i>bla</i> cat <i>cl857</i> IPR <i>flp</i> pSC101 <i>oriTS</i> | (2)           |
| pKD13                                       | <i>bla</i> FRT <i>ahp</i> FRT PS1 PS4 <i>oriR6K</i>            | (3)           |
| pWSK29                                      | <i>bla</i> <i>lacZa</i> <i>oripSC101</i>                       | (4)           |
| pSUB11                                      | <i>3xFLAG</i> FRT <i>ahp</i> FRT <i>bla</i> R6KoriV            | (5)           |
| pCE36                                       | <i>ahp</i> FRT <i>lacZY+</i> this <i>oriR6K</i>                | (6)           |
| pET14b                                      | His-tag expression vector with T7 promoter                     | Novagen       |
| pGEX-6P-1                                   | GST expression vector with tac promoter                        | GE Healthcare |

- McCollister BD, Bourret TJ, Gill R, Jones-Carson J, Vázquez-Torres A (2005) Repression of SPI2 transcription by nitric oxide-producing, IFN $\gamma$ -activated macrophages promotes maturation of *Salmonella* phagosomes. *J Exp Med* 202:625–635.
- Cherepanov PP, Wackernagel W (1995) Gene disruption in *Escherichia coli*: TcR and KmR cassettes with the option of FLP-catalyzed excision of the antibiotic-resistance determinant. *Gene* 158:9–14.
- Datsenko KA, Wanner BL (2000) One-step inactivation of chromosomal genes in *Escherichia coli* K-12 using PCR products. *Proc Natl Acad Sci USA* 97:6640–6645.
- Wang RF, Kushner SR (1991) Construction of versatile low-copy-number vectors for cloning, sequencing and gene expression in *Escherichia coli*. *Gene* 100:195–199.
- Uzzau S, Figueroa-Bossi N, Rubino S, Bossi L (2001) Epitope tagging of chromosomal genes in *Salmonella*. *Proc Natl Acad Sci USA* 98:15264–15269.
- Ellermeier CD, Janakiraman A, Slauch JM (2002) Construction of targeted single copy lac fusions using lambda Red and FLP-mediated site-specific recombination in bacteria. *Gene* 290: 153–161.
